# Supplementary material for: Caspase-6 promotes activation of the caspase-11-NLRP3 inflammasome during gram-negative bacterial infections
Source: PubMed Central journal article supplement (PMC8633687; doi:10.1016/j.jbc.2021.101379), 2021-11-02
Supplement: mmc1.pdf [file mmc1.pdf]

## Supporting Information

### **Caspase-6 promotes activation of the caspase-11-NLRP3 inflammasome during gram-negative bacterial infections**

Min Zheng<sup>1</sup>, Rajendra Karki<sup>1</sup>, Balabhaskararao Kancharana<sup>1</sup>, Hartmut Berns<sup>2</sup>, Shondra M. Pruett-Miller<sup>2</sup>, and Thirumala-Devi Kanneganti<sup>1\*</sup>

<sup>1</sup> *Department of Immunology*, <sup>2</sup> *Center for Advanced Genome Engineering, St. Jude Children's Research Hospital, Memphis, TN, 38105, USA*

#### **SUPPLEMENTARY FIGURES AND TABLES**

**Figure S1. CASP6 deficiency does not affect the priming of the CASP11-NLRP3 inflammasome.**

**Figure S2. CASP6 is not involved in LPS binding and is not able to directly cleave GSDMD.**

**Figure S3. The catalytically dead CASP6 mutant mouse carries the homozygous C146A mutation.**

**Table S1. List of CRISPR/Cas9 gene editing construct sequences and relevant primers.**

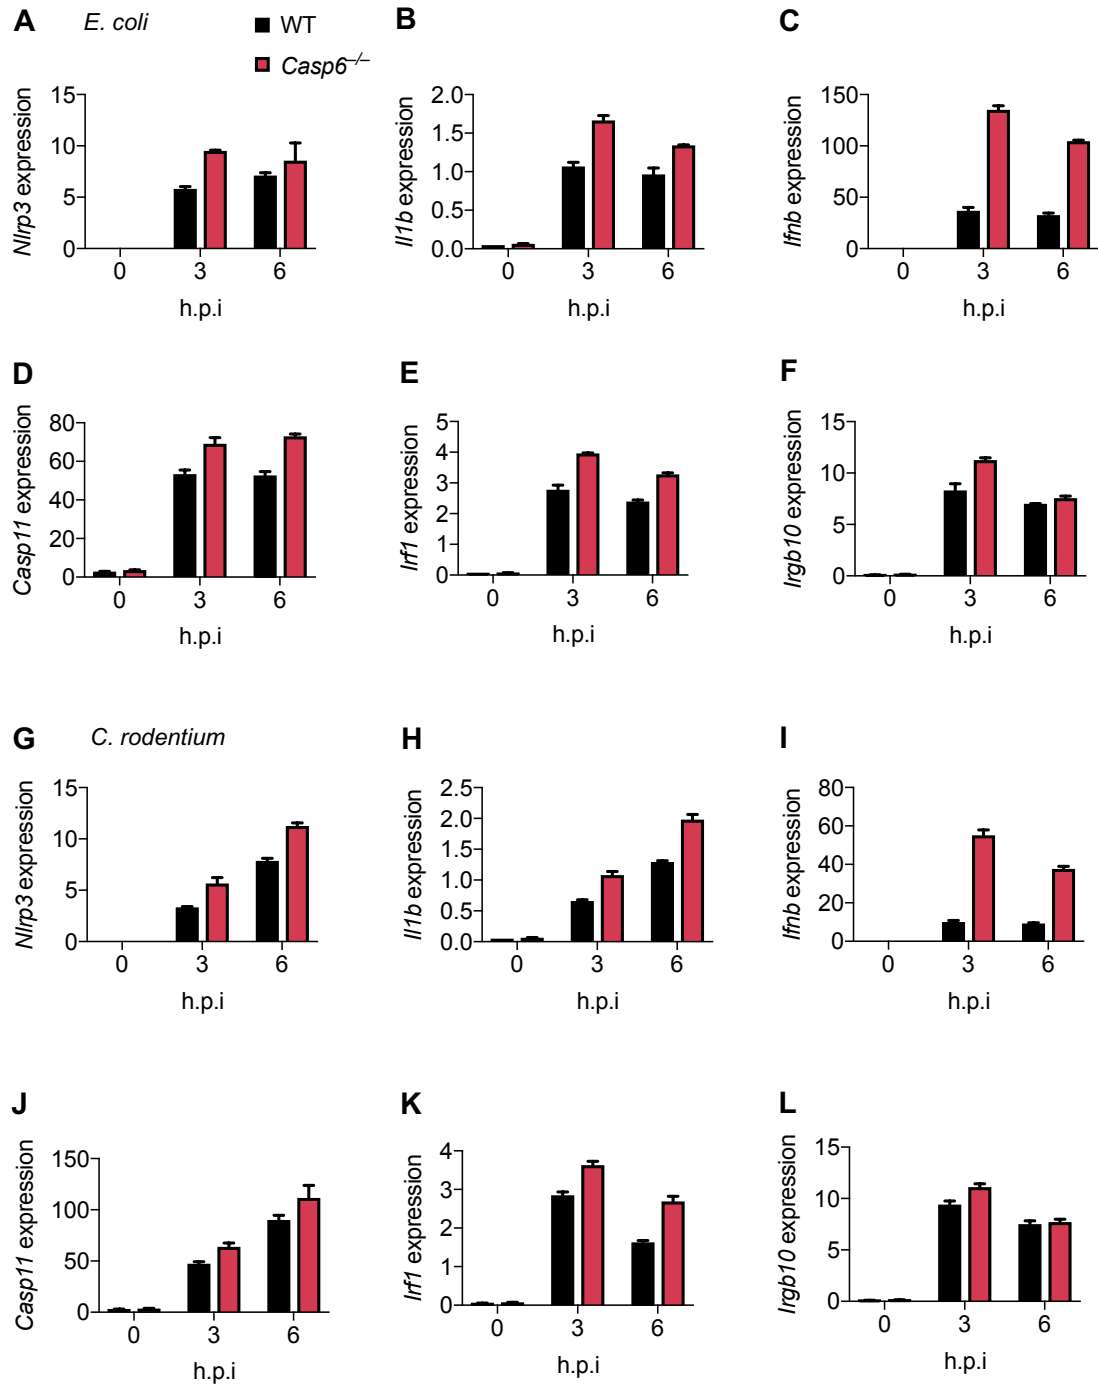

**Figure S1. CASP6 deficiency does not affect the priming of the CASP11-NLRP3 inflammasome.**

(A–F) Real time PCR analysis of the expression of *Nlrp3* (A), *Il1b* (B), *Ifnb* (C), *Casp11* (D), *Irf1* (E), and *Irgb10* (F) in bone marrow-derived macrophages (BMDMs) after infection with *E. coli* (20 MOI) for the indicated time. (G–L) Real time PCR analysis of the expression of *Nlrp3* (G), *Il1b* (H), *Ifnb* (I), *Casp11* (J), *Irf1* (K), and *Irgb10* (L) in BMDMs after infection with *C. rodentium* (20 MOI) for the indicated time. Data are representative of at least three independent experiments. Data are shown as mean  $\pm$  SEM (A–L).





**Table S1. List of CRISPR/Cas9 gene editing construct sequences and relevant primers.**

| <b>Name</b>                                   | <b>Sequence (5' to 3')</b>                                                                |
|-----------------------------------------------|-------------------------------------------------------------------------------------------|
| CAGE302.Casp6.g5 spacer                       | CCUCUCUUCUGUAGGCCUGU                                                                      |
| CAGE289.g3.sense.ssODN<br>*AltR modifications | *tgtccaggggaaccacgggtacgtcatgctggctaccccgGGCggcct<br>acagaagagaggggagaggggcacgttctctgcctg |
| CAGE302.DS.F                                  | GCATCTCTCAGAGCCTGATTGCCTCG                                                                |
| CAGE302.DS.R                                  | AGTAGCACATGAGGAAGTCTGCCCC                                                                 |
